# Supplementary material
Source: PubMed Central journal article supplement (PMC3477203)
Supplement: supp_112.046466_DMD_Supplemental_Figure_1.pdf [file supp_112.046466_DMD_Supplemental_Figure_1.pdf]

# Cytochrome P450 2S1 depletion enhances cell proliferation and migration in bronchial epithelial cells, in part, through modulation of prostaglandin E2 synthesis

Madanayake, T.W.; Fidler, T. P.; Fresquez, T. M.; Bajaj, N.; and Rowland, A.M.

Drug Metabolism and Disposition

## Supplemental Figure 1

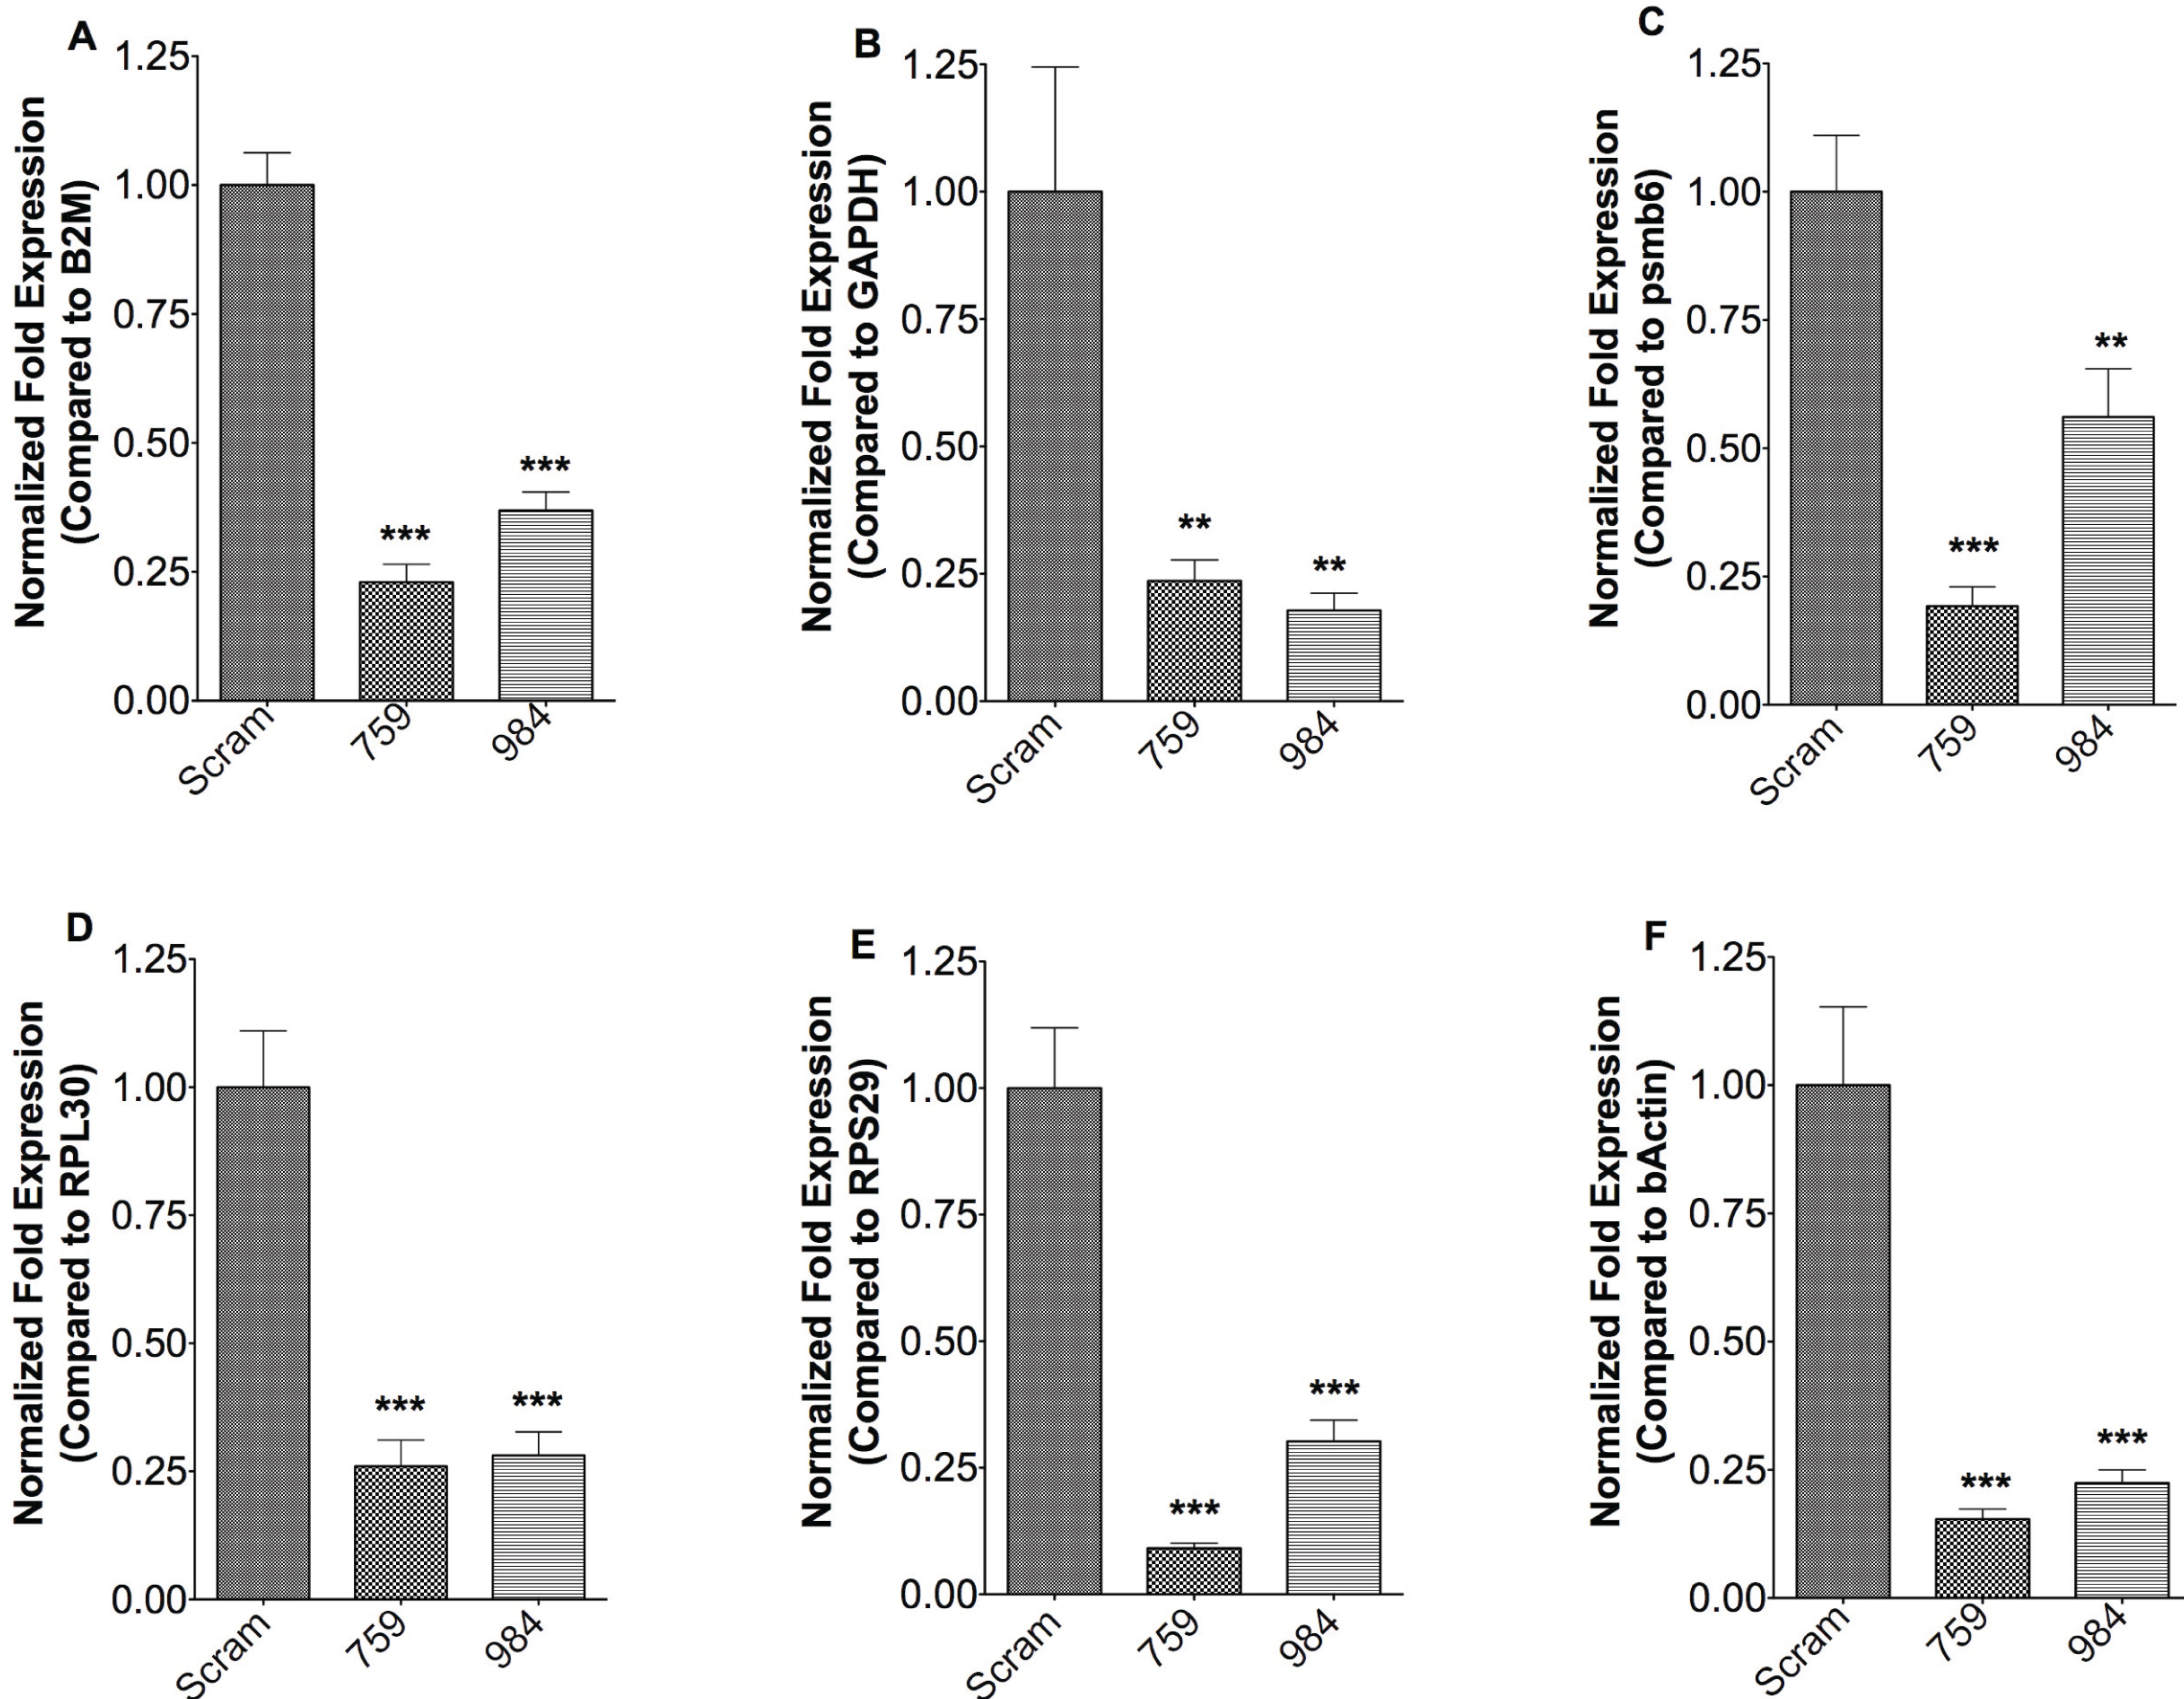

**Supplemental Figure 1:** qRT-PCR results using  $\beta$ -actin ACTB as well as five additional housekeeping genes for normalization. Each graph represents CYP2S1 mRNA expression in either CYP2S1 depleted BEAS-2B cell line (759 and 984) relative to CYP2S1 expression in scrambled control (SCRAM). Results from SCRAM were normalized to 1 and CYP2S1 depletion is indicated by normalized fold expression. Statistical analysis was performed using students t-test. \*\* indicates  $p < 0.01$  and \*\*\* indicates  $p < 0.001$ .
