# Supplementary material
Source: PubMed Central journal article supplement (PMC3477203)
Supplement: supp_112.046466_DMD_Supplemental_Table_1.pdf [file supp_112.046466_DMD_Supplemental_Table_1.pdf]

# Cytochrome P450 2S1 depletion enhances cell proliferation and migration in bronchial epithelial cells, in part, through modulation of prostaglandin E2 synthesis

Madanayake, T.W.; Fidler, T. P.; Fresquez, T. M.; Bajaj, N.; and Rowland, A.M.

Drug Metabolism and Disposition

## Supplemental Table 1

| Target | Forward Primer         | Reverse Primer         |
|--------|------------------------|------------------------|
| CYP2S1 | AGGCGTTCCTGCCCTTCTCC   | CAGTGGGACGGACTTGCAGC   |
| ACTB   | GACAACGGCTCCGGCATGTGCA | TGAGGATGCCTCTCTTGCTCTG |
| GAPDH  | GAAGGTGAAGGTCGGAGTC    | GAAGATGGTGATGGGATTTC   |
| B2M    | TCACCCCCACTGAAAAAGA    | GCGGCATCTTCAAACCTC     |
| PSMB6  | TACCAGCTCGGTTTCCACA    | CCCGGTATCGGTAACACATC   |
| RPL30  | ACAGCATGCGGAAAATACTAC  | AAAGGAAAATTTTGCAGGTTT  |
| RPS29  | GCACTGCTGAGAGCAAGATG   | ATAGGCAGTGCCAAGGAAGA   |

**Supplemental Table 1:** Primer sequences for CYP2S1 as well as each of the 5 housekeeping genes used in this study. Sequences are expressed in the 5' to 3' direction. Sequences were generated using Beacon Designer (Premier Biosoft International).
